# Supplementary material for: GEOMAPLEARN 1.0: Detecting geological structures from geological maps with machine learning
Source: Copernicus journal article supplement (doi:10.5194/gmd-2024-35), 2024-05-27

**A**

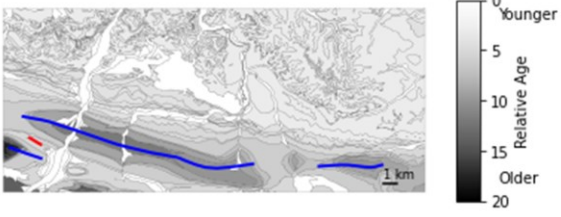

**B**

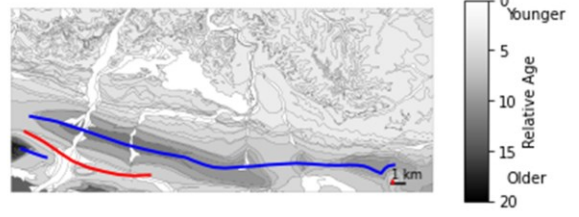

**C**

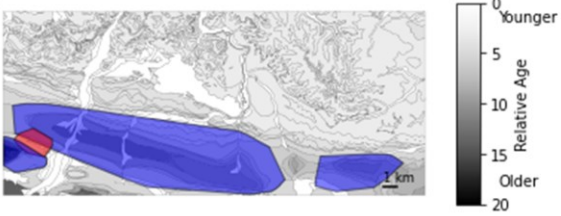

**D**

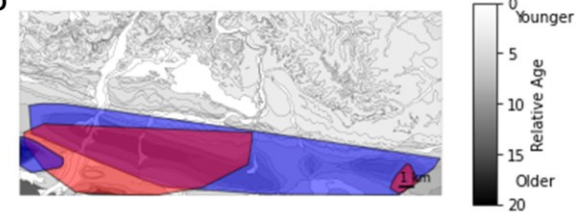

Supplement: Supplementary file [file gmd-2024-35-AC2-supplement.pdf]
